# Supplementary material for: Thermal sensitivity and niche plasticity of generalist and specialist leaf-endophytic bacteria in Mangrove Kandelia obovata
Source: PubMed Central journal article supplement — Commun Biol. 2025 Jan 3;8:5. doi: 10.1038/s42003-024-07446-1 (PMC11699152; doi:10.1038/s42003-024-07446-1), 2025-01-03
Supplement: 42003_2024_7446_MOESM1_ESM.pdf [file 42003_2024_7446_MOESM1_ESM.pdf]

**Supplementary materials - Thermal sensitivity of leaf endosphere microbiome:  
Niche plasticity of Generalists and Specialists bacteria in Mangrove**

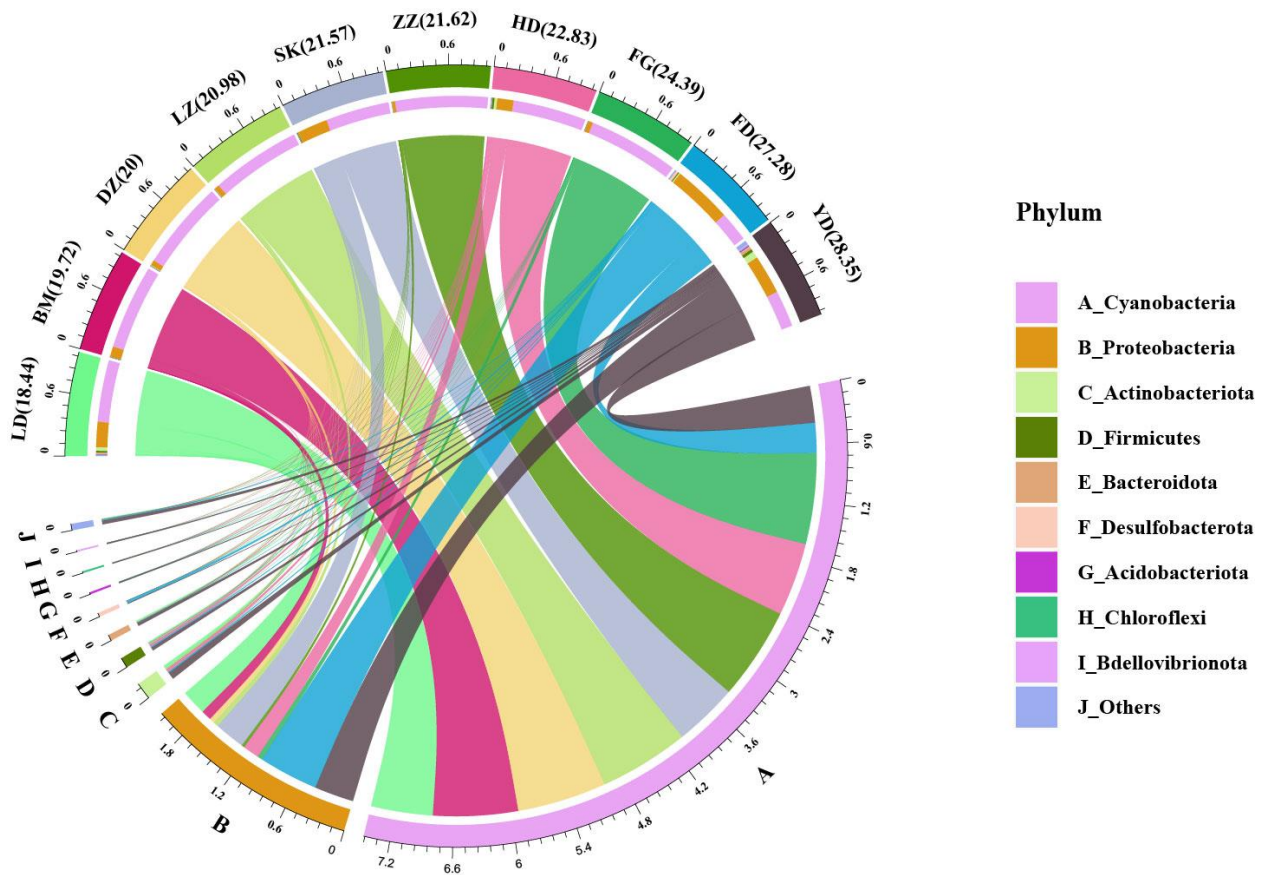

**Fig S1.** Distribution patterns of the top 10 at phylum levels of the leaf endophytic community are displayed using Circos analysis.

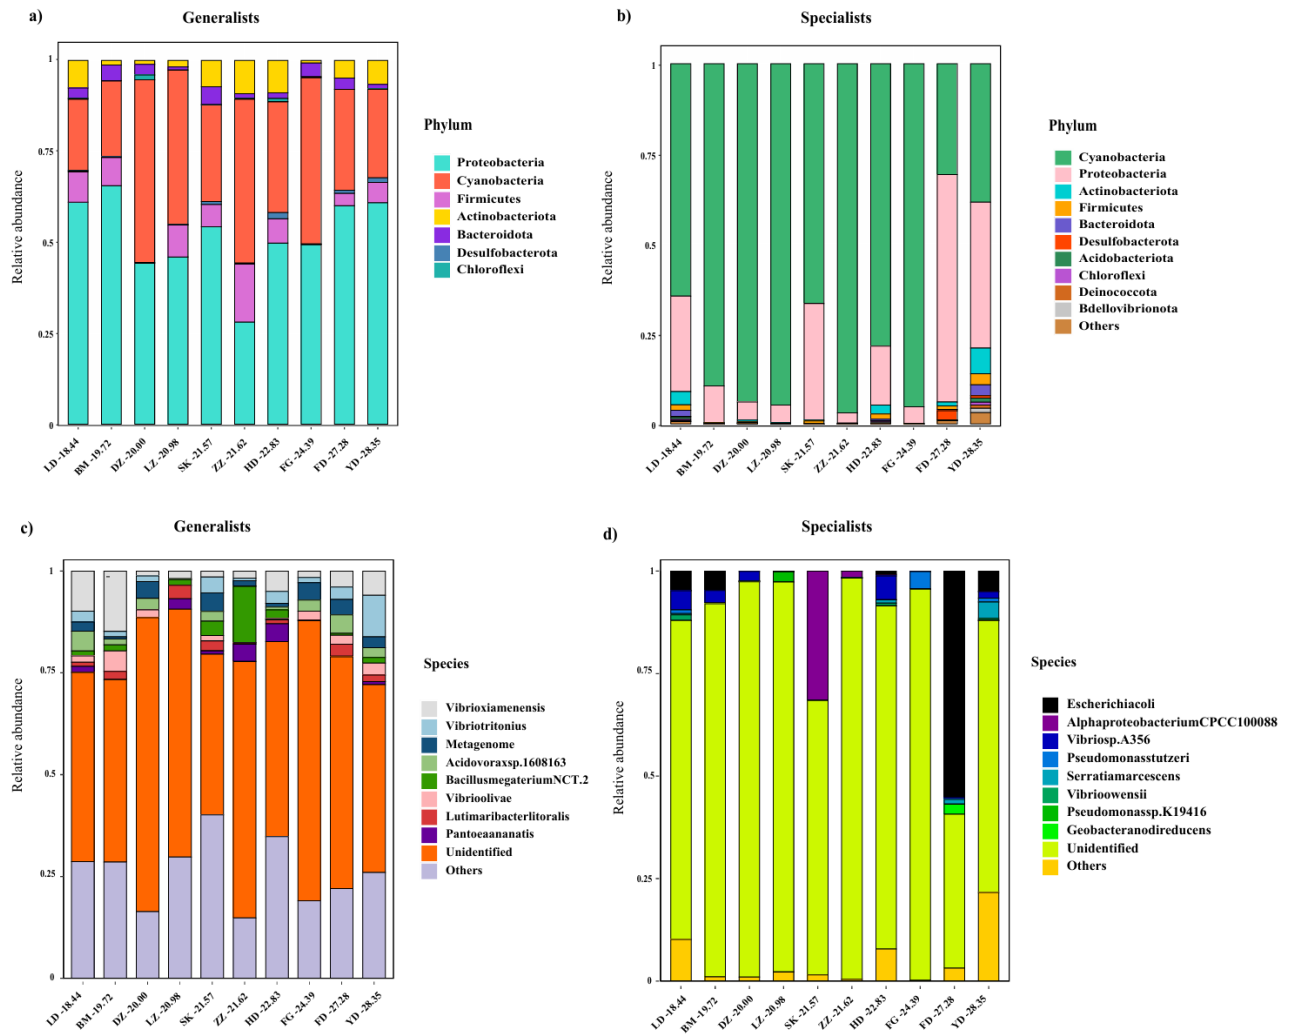

**Fig S2:** Relative abundance of dominant phylum of generalists (a), specialists (b) and dominant species level of generalists (c), specialists (d) across 10 mangrove sampling sites.

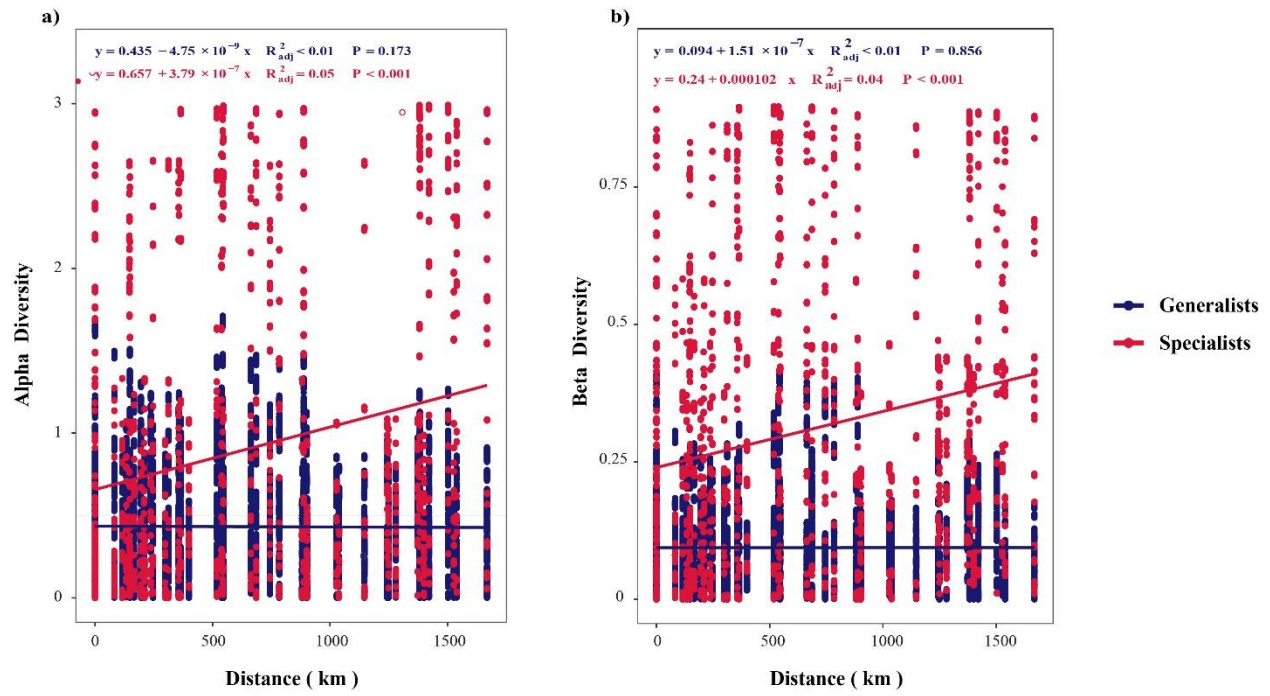

**Fig S3:** Linear regression for distance with alpha diversity (a) and beta diversity (b) of generalists and specialists

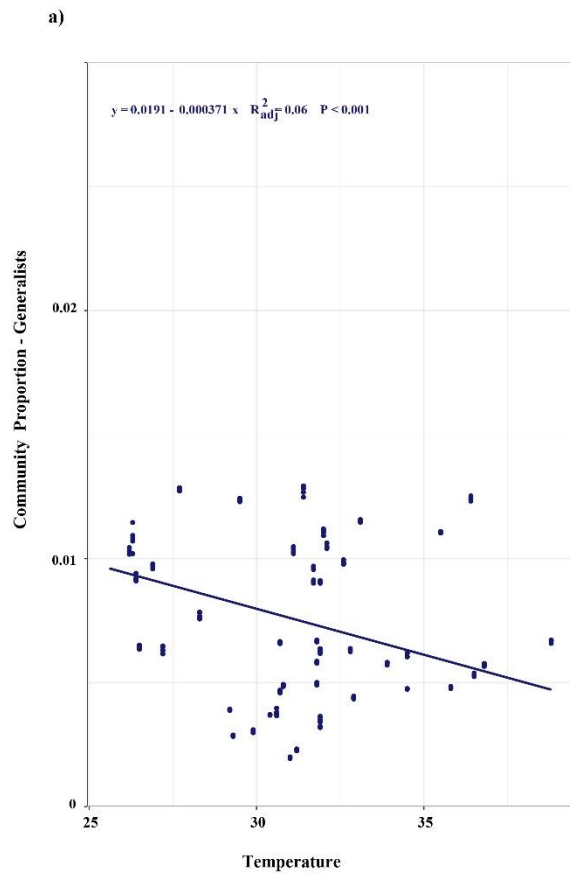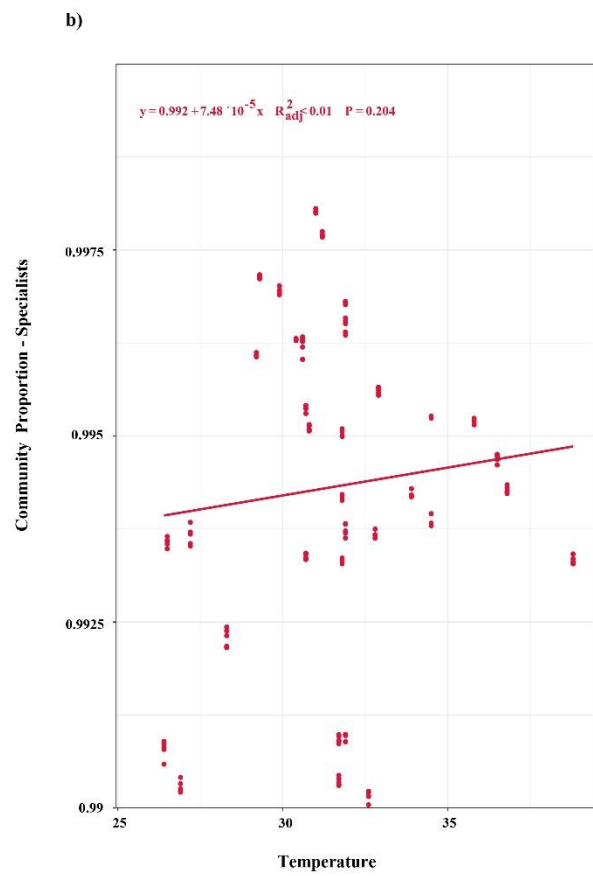

**Fig S4:** Linear regression for temperature with community proportion -generalists (a) and community proportion -specialist (b)

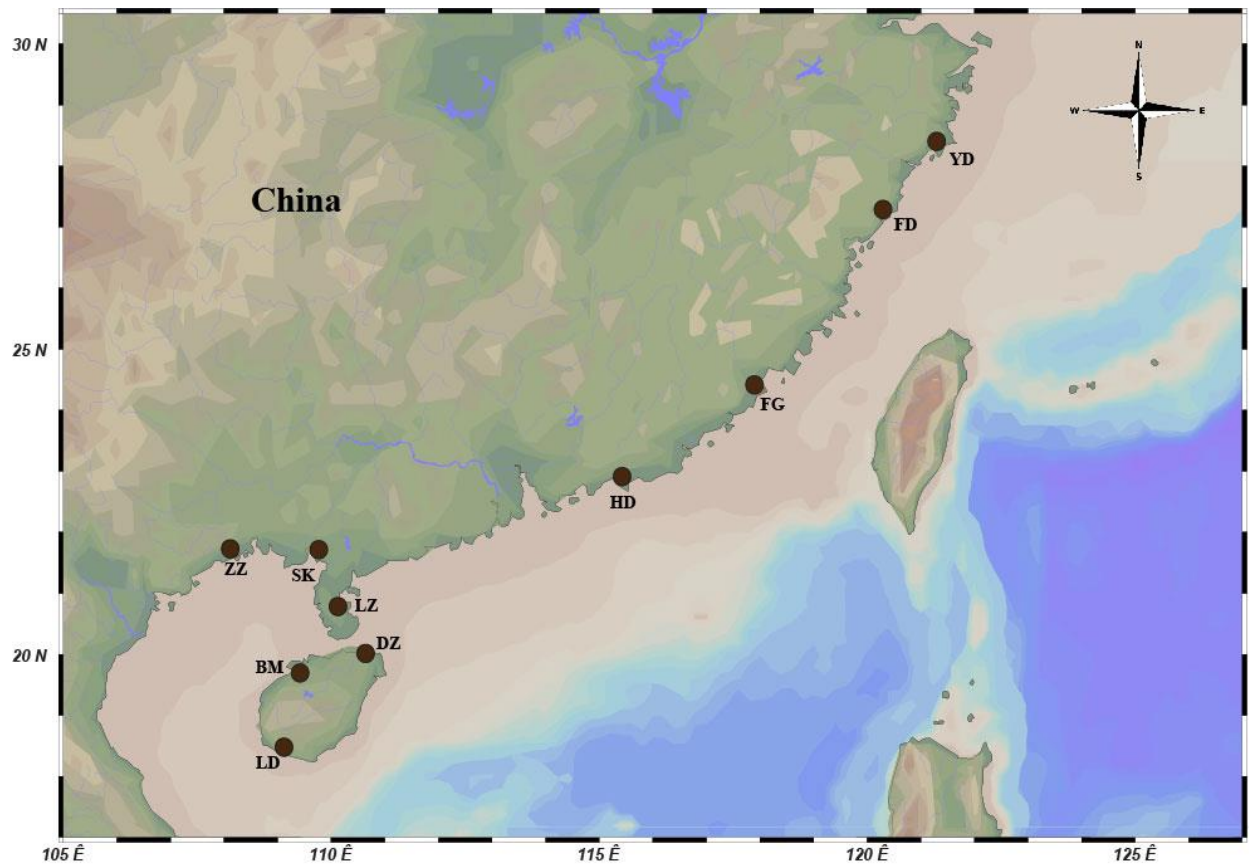

**Fig S5. Distribution of ten sampling sites in coastal mangrove wetlands across China.**

Three sites were from Hainan Province (DZ, BM, and LD), two from Guangxi Province (ZZ and SK), two from Guangdong Province (LZ and HD), two from Fujian Province (FG), and one from Zhejiang Province (YD).
