# Supplementary material for: Thermal sensitivity and niche plasticity of generalist and specialist leaf-endophytic bacteria in Mangrove Kandelia obovata
Source: PubMed Central journal article supplement — Commun Biol. 2025 Jan 3;8:5. doi: 10.1038/s42003-024-07446-1 (PMC11699152; doi:10.1038/s42003-024-07446-1), 2025-01-03
Supplement: 42003_2024_7446_MOESM2_ESM.pdf [file 42003_2024_7446_MOESM2_ESM.pdf]

## **Description of Additional Supplementary Files**

File name: Supplementary Data 1

Description: The source data behind the graphs in the paper

File name: Supplementary Data 2

Description: The 16S rRNA sequencing processed data used in the paper
